# Supplementary material
Source: PubMed Central journal article supplement (PMC5878062)
Supplement: NIHMS348807-supplement-Supplementary_Data.pdf [file NIHMS348807-supplement-Supplementary_Data.pdf]

## Supplemental Data

## Structure of the PduU Shell Protein

from the Pdu Microcompartment of *Salmonella*

Christopher S. Crowley, Michael R. Sawaya, Thomas A. Bobik, and Todd O. Yeates

Table S1. Data Collection and Refinement Statistics

|                                                     |                       |
|-----------------------------------------------------|-----------------------|
| <b>Data collection</b>                              |                       |
| Cell dimensions                                     |                       |
| <i>a</i> , <i>b</i> , <i>c</i> (Å)                  | 74.1, 74.1, 218.0     |
| $\alpha$ , $\beta$ , $\gamma$ (°)                   | 90, 90, 120           |
| Space group                                         | R3 (indexed as H3)    |
| Molecules/asymmetric unit                           | 4                     |
| Resolution (Å) (last shell)                         | 72.7-1.80 (1.85-1.80) |
| No. reflections total                               | 205624                |
| No. reflections unique                              | 40948                 |
| R <sub>sym</sub> (last shell)                       | 15.9% (50.5%)         |
| <i>I</i> / $\sigma$ <i>I</i> (last shell)           | 11.85 (2.33)          |
| Completeness (last shell)                           | 99.2% (93.5%)         |
| Redundancy                                          | 5.0                   |
| <b>Refinement</b>                                   |                       |
| Resolution (Å)                                      | 1.80                  |
| No. reflections R <sub>work</sub>                   | 38881                 |
| No. reflections R <sub>free</sub>                   | 2063                  |
| R <sub>work</sub> / R <sub>free</sub>               | 20.3 / 24.2%          |
| No. atoms non-H <sub>2</sub> O                      | 3527                  |
| No. solvent O atoms                                 | 167                   |
| Average <i>B</i> factor all atoms (Å <sup>2</sup> ) | 30.1                  |
| Est. coordinate error (Å)(Read, 1986)               | 0.116                 |
| R.M.S. deviations from ideality                     |                       |
| Bond lengths (Å)                                    | .012                  |
| Bond angles (°)                                     | 1.43                  |
| Ramachandran plot:                                  |                       |
| Most favored                                        | 94.0%                 |
| Allowed                                             | 5.0%                  |
| Generously allowed                                  | 1.0%                  |
| Disallowed                                          | 0%                    |

$$R_{\text{sym}} = \frac{\sum_{hkl} \sum_i |I_i(hkl) - \overline{I(hkl)}|}{\sum_{hkl} \sum_i I_i(hkl)}$$

$$R_{\text{work}} = \frac{\sum |F_{\text{obs}} - F_{\text{calc}}|}{\sum F_{\text{obs}}}$$

$R_{\text{free}} = \frac{\sum |F_{\text{obs}} - F_{\text{calc}}|}{\sum F_{\text{obs}}}$ , calculated using a random set containing 5% of reflections that were not included throughout refinement

## **Supplemental References**

Read, R.J. (1986). Improved Fourier coefficients for maps using phases from partial structures with errors. *Acta Cryst. A* *42*, 140–149.
